# Supplementary material for: Environmental profile analysis of particleboard production: a study in a Pakistani technological condition
Source: Springer Nature journal article supplement (doi:10.1007/s11367-017-1385-9), 2017-08-24
Supplement: MOESM1 [file 14240826]

Electronic supplementary material

[Exergy and LCA](javascript:popupClassificationDetail(50))

**Environmental profile analysis of particleboard production: A study in a Pakistani technological condition**

**Majid Hussain1, 2 • Riffat Naseem Malik2* • Adam Taylor3**

Received: 27 July 2016 / Accepted: 31 July 2017

© Springer-Verlag Berlin Heidelberg 2017

Responsible editor: Christopher J. Koroneos

1Environmental Biology and Ecotoxicology Laboratory, Department of Environmental Sciences, Quaid-i-Azam University, Islamabad, 45320, Pakistan

2Department of Forestry and Wildlife Management, University of Haripur, Hattar Road Haripur 22620, Khyber Pakhtunkhwa, Pakistan

3Center for Renewable Carbon, Department of Forestry, Wildlife and Fisheries, University of Tennessee, Knoxville, TN, 37996-4570, USA

 Riffat Naseem Malik

[r_n_malik2000@yahoo.co.uk](mailto:r_n_malik2000@yahoo.co.uk)

**PRIMARY DATA FOR LCA OF THE PARTICLEBOARD INDUSTRY IN PAKISTAN**

Production weighted average, standard deviation and co-efficient of variation for the inputs/outputs of manufacture of 1.0 m3 particleboard (PB) produced during 2015-2016

| **Groundwater consumption in PB industries** | **Ground water (liter)** | **PB production(m3)** |
| --- | --- | --- |
|  | xi | wi |
| PB mill 1 | 1135624 | 45000 |
| PB mill 2 | 1179360 | 37440 |
| PB mill 3 | 144000 | 30000 |
| PB mill 4 | 450000 | 60000 |
| PB mill 5 | 450000 | 75000 |
| PB mill 6 | 300000 | 30000 |
| PB mill 7 | 624000 | 56160 |
| PB mill 8 | 300000 | 33000 |
|  |  |  |
| N | 8 |  |
| Mill average (unweighted) | 572873 m3 |  |
| Production-weighted average (Ẋw) | 584484.8838 m3 |  |
| Sdw | 354741.8835 |  |
| CVw | 0.606930809 |  |
| CVw | 60.69% |  |

| **Municipal water consumption in PB industries** | | **Municipal water (liter)** | | **PB production (m3)** | |
| --- | --- | --- | --- | --- | --- |
|  | | xi | | wi | |
| PB mill 1 | | 150000 | | 45000 | |
| PB mill 2 | | 156000 | | 37440 | |
| PB mill 3 | | 150000 | | 30000 | |
| PB mill 4 | | 150000 | | 60000 | |
| PB mill 5 | | 312000 | | 75000 | |
| PB mill 6 | | 150000 | | 30000 | |
| PB mill 7 | | 300000 | | 56160 | |
| PB mill 8 | | 150000 | | 33000 | |
|  | |  | |  | |
| N | | 8 | |  | |
| Mill average (unweighted) | | 189750 m3 | |  | |
| Production-weighted average (Ẋw) | | 206733.8789 m3 | |  | |
| Sdw | | 80005.85119 | |  | |
| CVw | | 0.386999226 | |  | |
| CVw | | 38.69% | |  | |
| **Wood logs consumption in PB industries** | **Wood logs (tonne)** | | **Wood logs (Kg)** | | **PB production (m3)** | |
|  | xi | |  | | wi | |
| PB mill 1 | 31500 | | 31500000 | | 45000 | |
| PB mill 2 | 21600 | | 21600000 | | 37440 | |
| PB mill 3 | 19500 | | 19500000 | | 30000 | |
| PB mill 4 | 42000 | | 42000000 | | 60000 | |
| PB mill 5 | 56250 | | 56250000 | | 75000 | |
| PB mill 6 | 18000 | | 18000000 | | 30000 | |
| PB mill 7 | 37800 | | 37800000 | | 56160 | |
| PB mill 8 | 24750 | | 24750000 | | 33000 | |
|  |  | |  | |  | |
| N | 8 | |  | |  | |
| Mill average (unweighted) | 31425 m3 | |  | |  | |
| Production-weighted average (Ẋw) | 35541.6039 m3 | |  | |  | |
| Sdw | 14098.36452 | |  | |  | |
| CVw | 0.396672152 | |  | |  | |
| CVw | 39.66% | |  | |  | |

| **U-F Resin consumption in PB industries** | **UF Resin (kg)** | **PB production (m3)** |
| --- | --- | --- |
|  | xi | wi |
| PB mill 1 | 3600000 | 45000 |
| PB mill 2 | 2620800 | 37440 |
| PB mill 3 | 2100000 | 30000 |
| PB mill 4 | 4800000 | 60000 |
| PB mill 5 | 6750000 | 75000 |
| PB mill 6 | 2400000 | 30000 |
| PB mill 7 | 5054400 | 56160 |
| PB mill 8 | 2640000 | 33000 |
|  |  |  |
| N | 8 |  |
| Mill average (unweighted) | 3745650 m3 |  |
| Production-weighted average (Ẋw) | 4256268.02 m3 |  |
| Sdw | 1737601.653 |  |
| CVw | 0.408245356 |  |
| CVw | 40.82% |  |

| **Urea Scavenger consumption in PB industries** | **Urea scavenger (kg)** | **PB production (m3)** |
| --- | --- | --- |
|  | xi | wi |
| PB mill 1 | 180000 | 45000 |
| PB mill 2 | 156000 | 37440 |
| PB mill 3 | 135000 | 30000 |
| PB mill 4 | 240000 | 60000 |
| PB mill 5 | 300000 | 75000 |
| PB mill 6 | 150000 | 30000 |
| PB mill 7 | 280800 | 56160 |
| PB mill 8 | 180000 | 33000 |
|  |  |  |
| N | 8 |  |
| Mill average (unweighted) | 202725 m3 |  |
| Production-weighted average (Ẋw) | 221223.0442 m3 |  |
| Sdw | 64944.45673 |  |
| CVw | 0.293570035 |  |
| CVw | 29.35% |  |

| **Wax consumption in PB industries** | **Wax (kg)** | **PB production (m3)** |
| --- | --- | --- |
|  | xi | wi |
| PB mill 1 | 135000 | 45000 |
| PB mill 2 | 124800 | 37440 |
| PB mill 3 | 900000 | 30000 |
| PB mill 4 | 300000 | 60000 |
| PB mill 5 | 450000 | 75000 |
| PB mill 6 | 120000 | 30000 |
| PB mill 7 | 202800 | 56160 |
| PB mill 8 | 135000 | 33000 |
|  |  |  |
| N | 8 |  |
| Mill average (unweighted) | 295950 m3 |  |
| Production-weighted average (Ẋw) | 297167.9214 m3 |  |
| Sdw | 231963.2395 |  |
| CVw | 0.780579675 |  |
| CVw | 78.00% |  |

| **Ammonium sulphate consumption in PB industries** | **Ammonium sulphate (kg)** | **PB production (m3)** |
| --- | --- | --- |
|  | xi | wi |
| PB mill 1 | 45000 | 45000 |
| PB mill 2 | 46800 | 37440 |
| PB mill 3 | 36000 | 30000 |
| PB mill 4 | 90000 | 60000 |
| PB mill 5 | 150000 | 75000 |
| PB mill 6 | 36000 | 30000 |
| PB mill 7 | 78000 | 56160 |
| PB mill 8 | 36000 | 33000 |
|  |  |  |
| N | 8 |  |
| Mill average (unweighted) | 64725 m3 |  |
| Production-weighted average (Ẋw) | 76802.1603 m3 |  |
| Sdw | 44890.6599 |  |
| CVw | 0.584497359 |  |
| CVw | 58.44% |  |

| **Purchased Electricity consumption in PB industries** | **Electricity (kWh)** | **PB production (m3)** |
| --- | --- | --- |
|  | xi | wi |
| PB mill 1 | 7650000 | 45000 |
| PB mill 2 | 6552000 | 37440 |
| PB mill 3 | 4200000 | 30000 |
| PB mill 4 | 9600000 | 60000 |
| PB mill 5 | 12000000 | 75000 |
| PB mill 6 | 4500000 | 30000 |
| PB mill 7 | 10108800 | 56160 |
| PB mill 8 | 5280000 | 33000 |
|  |  |  |
| N | 8 |  |
| Mill average (unweighted) | 7486350 m3 |  |
| Production-weighted average (Ẋw) | 8370177.545 m3 |  |
| Sdw | 2891523.442 |  |
| CVw | 0.345455449 |  |
| CVw | 34.50% |  |

| **Diesel consumption in PB industries** | **Diesel (liter)** | **PB production (m3)** |
| --- | --- | --- |
|  | xi | wi |
| PB mill 1 | 36000 | 45000 |
| PB mill 2 | 31200 | 37440 |
| PB mill 3 | 30000 | 30000 |
| PB mill 4 | 45000 | 60000 |
| PB mill 5 | 90000 | 75000 |
| PB mill 6 | 24960 | 30000 |
| PB mill 7 | 78000 | 56160 |
| PB mill 8 | 36000 | 33000 |
|  |  |  |
| N | 8 |  |
| Mill average (unweighted) | 46395 m3 |  |
| Production-weighted average (Ẋw) | 53069.852m3 |  |
| Sdw | 26272.04574 |  |
| CVw | 0.495046517 |  |
| CVw | 49.50% |  |

| **Petrol consumption in PB industries** | **Petrol (liter)** | **PB production (m3)** |
| --- | --- | --- |
|  | xi | wi |
| PB mill 1 | 15000 | 45000 |
| PB mill 2 | 12480 | 37440 |
| PB mill 3 | 15000 | 30000 |
| PB mill 4 | 30000 | 60000 |
| PB mill 5 | 60000 | 75000 |
| PB mill 6 | 21000 | 30000 |
| PB mill 7 | 46800 | 56160 |
| PB mill 8 | 27000 | 33000 |
|  |  |  |
| N | 8 |  |
| Mill average (unweighted) | 28410 m3 |  |
| Production-weighted average (Ẋw) | 32846.53 m3 |  |
| Sdw | 18641.77327 |  |
| CVw | 0.567541571 |  |
| CVw | 56.70% |  |

| **Natural gas consumption in PB industries** | **Natural gas (m3)** | **PB production (m3)** |
| --- | --- | --- |
|  | xi | wi |
| PB mill 1 | 1350000 | 45000 |
| PB mill 2 | 1310400 | 37440 |
| PB mill 3 | 900000 | 30000 |
| PB mill 4 | 2400000 | 60000 |
| PB mill 5 | 3000000 | 75000 |
| PB mill 6 | 900000 | 30000 |
| PB mill 7 | 2134080 | 56160 |
| PB mill 8 | 990000 | 33000 |
|  |  |  |
| N | 8 |  |
| Mill average (unweighted) | 1623060 m3 |  |
| Production-weighted average (Ẋw) | 1869425.283 m3 |  |
| Sdw | 832732.844 |  |
| CVw | 0.445448583 |  |
| CVw | 44.54% |  |

| **Heavy fuel oil (HFO) consumption in PB industries** | **HFO (liter)** | **PB production (m3)** |
| --- | --- | --- |
|  | xi | wi |
| PB mill 1 | 675000 | 45000 |
| PB mill 2 | 486720 | 37440 |
| PB mill 3 | 360000 | 30000 |
| PB mill 4 | 1080000 | 60000 |
| PB mill 5 | 1500000 | 75000 |
| PB mill 6 | 360000 | 30000 |
| PB mill 7 | 842400 | 56160 |
| PB mill 8 | 429000 | 33000 |
|  |  |  |
| N | 8 |  |
| Mill average (unweighted) | 716640 m3 |  |
| Production-weighted average (Ẋw) | 842782.27 m3 |  |
| Sdw | 437576.3399 |  |
| CVw | 0.51920449 |  |
| CVw | 51.90% |  |

| **Wood wastes consumption in PB industries** | **Wood waste (kg)** | **PB production (m3)** |
| --- | --- | --- |
|  | xi | wi |
| PB mill 1 | 180000 | 45000 |
| PB mill 2 | 224640 | 37440 |
| PB mill 3 | 200000 | 30000 |
| PB mill 4 | 420000 | 60000 |
| PB mill 5 | 600000 | 75000 |
| PB mill 6 | 150000 | 30000 |
| PB mill 7 | 280800 | 56160 |
| PB mill 8 | 198000 | 33000 |
|  |  |  |
| N | 8 |  |
| Mill average (unweighted) | 281680 m3 |  |
| Production-weighted average (Ẋw) | 326007.2 m3 |  |
| Sdw | 172686.4126 |  |
| CVw | 0.529701179 |  |
| CVw | 52.90% |  |

| **Sander dust consumption in PB industries** | | **Sander dust (kg)** | | **PB production (m3)** | |
| --- | --- | --- | --- | --- | --- |
|  | | xi | | wi | |
| PB mill 1 | | 900000 | | 45000 | |
| PB mill 2 | | 780000 | | 37440 | |
| PB mill 3 | | 600000 | | 30000 | |
| PB mill 4 | | 1500000 | | 60000 | |
| PB mill 5 | | 2100000 | | 75000 | |
| PB mill 6 | | 750000 | | 30000 | |
| PB mill 7 | | 1872000 | | 56160 | |
| PB mill 8 | | 900000 | | 33000 | |
|  | |  | |  | |
| N | | 8 | |  | |
| Mill average (unweighted) | | 1175250 m3 | |  | |
| Production-weighted average (Ẋw) | | 1343520.786 m3 | |  | |
| Sdw | | 597344.4663 | |  | |
| CVw | | 0.444611258 | |  | |
| CVw | | 44.40% | |  | |
|  |
|  |
| **Wood fuel (kg) in PB industries** | | **Wood fuel** | **PB production (m3)** | |
|  | | **xi** | **wi** | |
| PB mill 1 | | 300000 | 45000 | |
| PB mill 2 | | 149760 | 37440 | |
| PB mill 3 | | 120000 | 30000 | |
| PB mill 4 | | 360000 | 60000 | |
| PB mill 5 | | 360000 | 75000 | |
| PB mill 6 | | 45000 | 30000 | |
| PB mill 7 | | 449280 | 56160 | |
| PB mill 8 | | 132000 | 33000 | |
|  | |  |  | |
| N | | 8 |  | |
| Mill average (unweighted) | | 239505 m3 |  | |
| Production-weighted average (Ẋw) | | 278899.5 m3 |  | |
| Sdw | | 139847.6923 |  | |
| CVw | | 50.1% |  | |

| **Transport of Wood logs by the PB industries** | **Wood logs transport (t.km)** | **PB production (m3)** |
| --- | --- | --- |
|  | xi | wi |
| PB mill 1 | 400 | 45000 |
| PB mill 2 | 100 | 37440 |
| PB mill 3 | 100 | 30000 |
| PB mill 4 | 400 | 60000 |
| PB mill 5 | 200 | 75000 |
| PB mill 6 | 500 | 30000 |
| PB mill 7 | 500 | 56160 |
| PB mill 8 | 500 | 33000 |
|  |  |  |
| N | 8 |  |
| Mill average (unweighted) | 337.5 m3 |  |
| Production-weighted average (Ẋw) | 336.399 m3 |  |
| Sdw | 165.4263298 |  |
| CVw | 0.491755802 |  |
| CVw | 49.17% |  |

| **Transport of UF resin by the PB industries** | **UF resin transport (t.km)** | **PB production (m3)** |
| --- | --- | --- |
|  | xi | wi |
| PB mill 1 | 125 | 45000 |
| PB mill 2 | 125 | 37440 |
| PB mill 3 | 90 | 30000 |
| PB mill 4 | 120 | 60000 |
| PB mill 5 | 125 | 75000 |
| PB mill 6 | 100 | 30000 |
| PB mill 7 | 70 | 56160 |
| PB mill 8 | 150 | 33000 |
|  |  |  |
| N | 8 |  |
| Mill average (unweighted) | 113.125 m3 |  |
| Production-weighted average (Ẋw) | 113.0965 m3 |  |
| Sdw | 24.69136315 |  |
| CVw | 0.218321074 |  |
| CVw | 21.83% |  |

| **Transport of Wax by the PB industries** | **Wax transport (t.km)** | **PB production (m3)** |
| --- | --- | --- |
|  | xi | wi |
| PB mill 1 | 125 | 45000 |
| PB mill 2 | 100 | 37440 |
| PB mill 3 | 50 | 30000 |
| PB mill 4 | 100 | 60000 |
| PB mill 5 | 125 | 75000 |
| PB mill 6 | 100 | 30000 |
| PB mill 7 | 70 | 56160 |
| PB mill 8 | 150 | 33000 |
|  |  |  |
| N | 8 |  |
| Mill average (unweighted) | 102.5 m3 |  |
| Production-weighted average (Ẋw) | 103.997 m3 |  |
| Sdw | 29.39591294 |  |
| CVw | 0.282661906 |  |
| CVw | 28.26% |  |

| **Product distribution distance covered by the PB industries** | **product distribution transport distance (t.km)** | **PB production (m3)** |
| --- | --- | --- |
|  | xi | wi |
| PB mill 1 | 1000 | 45000 |
| PB mill 2 | 700 | 37440 |
| PB mill 3 | 700 | 30000 |
| PB mill 4 | 1000 | 60000 |
| PB mill 5 | 1000 | 75000 |
| PB mill 6 | 700 | 30000 |
| PB mill 7 | 700 | 56160 |
| PB mill 8 | 700 | 33000 |
|  |  |  |
| N | 8 |  |
| Mill average (unweighted) | 812.5 m3 |  |
| Production-weighted average (Ẋw) | 847.299 m3 |  |
| Sdw | 160.3307558 |  |
| CVw | 0.189225597 |  |
| CVw | 18.92% |  |

| **Batteries wastes produced by PB industries** | **Batteries waste (kg)** | **PB production (m3)** |
| --- | --- | --- |
|  | xi | wi |
| PB mill 1 | 200 | 45000 |
| PB mill 2 | 160 | 37440 |
| PB mill 3 | 120 | 30000 |
| PB mill 4 | 280 | 60000 |
| PB mill 5 | 800 | 75000 |
| PB mill 6 | 100 | 30000 |
| PB mill 7 | 180 | 56160 |
| PB mill 8 | 120 | 33000 |
|  |  |  |
| N | 8 |  |
| Mill average (unweighted) | 245 m3 |  |
| Production-weighted average (Ẋw) | 306.762 m3 |  |
| Sdw | 273.4787424 |  |
| CVw | 0.891499379 |  |
| CVw | 89.14% |  |

| **Air filters wastes produced by PB industries** | **Air filters waste (kg)** | **PB production (m3)** |
| --- | --- | --- |
|  | xi | wi |
| PB mill 1 | 43 | 45000 |
| PB mill 2 | 30 | 37440 |
| PB mill 3 | 26 | 30000 |
| PB mill 4 | 54 | 60000 |
| PB mill 5 | 72 | 75000 |
| PB mill 6 | 18 | 30000 |
| PB mill 7 | 40 | 56160 |
| PB mill 8 | 14 | 33000 |
|  |  |  |
| N | 8 |  |
| Mill average (unweighted) | 37.125 m3 |  |
| Production-weighted average (Ẋw) | 42.898 m3 |  |
| Sdw | 20.31142657 |  |
| CVw | 0.473476084 |  |
| CVw | 47.34% |  |

| **Oil filters wastes produced by PB industries** | **Oil filters waste (kg)** | **PB production (m3)** |
| --- | --- | --- |
|  | xi | wi |
| PB mill 1 | 60 | 45000 |
| PB mill 2 | 42 | 37440 |
| PB mill 3 | 36 | 30000 |
| PB mill 4 | 75 | 60000 |
| PB mill 5 | 200 | 75000 |
| PB mill 6 | 30 | 30000 |
| PB mill 7 | 55 | 56160 |
| PB mill 8 | 25 | 33000 |
|  |  |  |
| N | 8 |  |
| Mill average (unweighted) | 65.375 m3 |  |
| Production-weighted average (Ẋw) | 80.922 m3 |  |
| Sdw | 66.56346651 |  |
| CVw | 0.82255567 |  |
| CVw | 82.25% |  |

| **Lubricants etc. wastes produced by PB industries** | **Lubricants oil etc. waste (liters)** | **PB production (m3)** |
| --- | --- | --- |
|  | xi | wi |
| PB mill 1 | 1000 | 45000 |
| PB mill 2 | 1000 | 37440 |
| PB mill 3 | 800 | 30000 |
| PB mill 4 | 1200 | 60000 |
| PB mill 5 | 1500 | 75000 |
| PB mill 6 | 1000 | 30000 |
| PB mill 7 | 1200 | 56160 |
| PB mill 8 | 1000 | 33000 |
|  |  |  |
| N | 8 |  |
| Mill average (unweighted) | 1087.5 m3 |  |
| Production-weighted average (Ẋw) | 1149.296 m3 |  |
| Sdw | 226.2840786 |  |
| CVw | 0.196889254 |  |
| CVw | 19.68% |  |

| **Fluorescent Lamp wastes produced by PB industries** | **Fluorescent lamp waste (kg)** | **PB production (m3)** |
| --- | --- | --- |
|  | xi | wi |
| PB mill 1 | 30 | 45000 |
| PB mill 2 | 24 | 37440 |
| PB mill 3 | 16 | 30000 |
| PB mill 4 | 36 | 60000 |
| PB mill 5 | 45 | 75000 |
| PB mill 6 | 21 | 30000 |
| PB mill 7 | 21 | 56160 |
| PB mill 8 | 45 | 33000 |
|  |  |  |
| N | 8 |  |
| Mill average (unweighted) | 29.75 m3 |  |
| Production-weighted average (Ẋw) | 31.522 m3 |  |
| Sdw | 11.14049908 |  |
| CVw | 0.35336003 |  |
| CVw | 35.33% |  |

| **Wiping clothes wastes produced by PB industries** | **Wiping clothes waste (kg)** | **PB production (m3)** |
| --- | --- | --- |
|  | xi | wi |
| PB mill 1 | 240 | 45000 |
| PB mill 2 | 200 | 37440 |
| PB mill 3 | 150 | 30000 |
| PB mill 4 | 300 | 60000 |
| PB mill 5 | 500 | 75000 |
| PB mill 6 | 200 | 30000 |
| PB mill 7 | 500 | 56160 |
| PB mill 8 | 300 | 33000 |
|  |  |  |
| N | 8 |  |
| Mill average (unweighted) | 298.75 m3 |  |
| Production-weighted average (Ẋw) | 333.5188 m3 |  |
| Sdw | 140.6523732 |  |
| CVw | 0.421722446 |  |
| CVw | 42.17% |  |

| **SPM emitted to air by PB industries** | **SPM (mg/m3)** | **PB production (m3)** |
| --- | --- | --- |
|  | xi | wi |
| PB mill 1 | 2520 | 45000 |
| PB mill 2 | 505 | 37440 |
| PB mill 3 | 801 | 30000 |
| PB mill 4 | NA | NA |
| PB mill 5 | NA | NA |
| PB mill 6 | NA | NA |
| PB mill 7 | NA | NA |
| PB mill 8 | NA | NA |
|  |  |  |
| N | 3 |  |
| Mill average (unweighted) | 1275.333 m3 |  |
| Production-weighted average (Ẋw) | 1390.405 m3 |  |
| Sdw | 1138.677121 |  |
| CVw | 0.818953234 |  |
| CVw | 82% |  |

NA= Data not available

| **CO emitted to air by PB industries** | **CO (mg/m3)** | **PB production (m3)** |
| --- | --- | --- |
|  | xi | wi |
| PB mill 1 | 395 | 45000 |
| PB mill 2 | 1820 | 37440 |
| PB mill 3 | 2825 | 30000 |
| PB mill 4 | 1217 | 60000 |
| PB mill 5 | NA | NA |
| PB mill 6 | NA | NA |
| PB mill 7 | NA | NA |
| PB mill 8 | NA | NA |
|  |  |  |
| N | 4 |  |
| Mill average (unweighted) | 1564.25 m3 |  |
| Production-weighted average (Ẋw) | 1413.1628 m3 |  |
| Sdw | 942.7834289 |  |
| CVw | 0.667144226 |  |
| CVw | 67% |  |

| **NOx emitted to air by PB industries** | **NOx (mg/m3)** | **PB production (**m3**)** |
| --- | --- | --- |
|  | xi | wi |
| PB mill 1 | 304 | 45000 |
| PB mill 2 | 190 | 37440 |
| PB mill 3 | 165 | 30000 |
| PB mill 4 | 425 | 60000 |
| PB mill 5 | NA | NA |
| PB mill 6 | NA | NA |
| PB mill 7 | NA | NA |
| PB mill 8 | NA | NA |
|  |  |  |
| N | 4 |  |
| Mill average (unweighted) | 271 m3 |  |
| Production-weighted average (Ẋw) | 297.167 m3 |  |
| Sdw | 122.3690324 |  |
| CVw | 0.411784417 |  |
| CVw | 41% |  |

NA=Data not available

| **SOx emitted to air by PB industry** | **SOx (mg/m3)** | **PB production (m3)** |
| --- | --- | --- |
|  | xi | wi |
| PB mill 1 | 75 | 45000 |
| PB mill 2 | 51 | 37440 |
| PB mill 3 | 10 | 30000 |
| PB mill 4 | NA | NA |
| PB mill 5 | NA | NA |
| PB mill 6 | NA | NA |
| PB mill 7 | NA | NA |
| PB mill 8 | NA | NA |
|  |  |  |
| N | 3 |  |
| Mill average (unweighted) | 45.33 m3 |  |
| Production-weighted average (Ẋw) | 49.665 m3 |  |
| Sdw | 31.8727738 |  |
| CVw | 0.641742894 |  |
| CVw | 64% |  |

NA = Data not available

| **Rubber wastes produced by PB industries** | **Rubber waste (kg)** | **PB production (m3)** |
| --- | --- | --- |
|  | xi | wi |
| PB mill 1 | 2000 | 45000 |
| PB mill 2 | 1600 | 37440 |
| PB mill 3 | 1200 | 30000 |
| PB mill 4 | 2800 | 60000 |
| PB mill 5 | 4600 | 75000 |
| PB mill 6 | 1000 | 30000 |
| PB mill 7 | 1800 | 56160 |
| PB mill 8 | 1200 | 33000 |
|  |  |  |
| N | 8 |  |
| Mill average (unweighted) | 2025 m3 |  |
| Production-weighted average (Ẋw) | 2372.045 m3 |  |
| Sdw | 1336.772968 |  |
| CVw | 0.563552758 |  |
| CVw | 56.35% |  |

| **Paper and cardboard wastes produced by PB industries** | **Paper and cardboard waste (kg)** | **PB production (m3)** |
| --- | --- | --- |
|  | xi | wi |
| PB mill 1 | 360 | 45000 |
| PB mill 2 | 800 | 37440 |
| PB mill 3 | 200 | 30000 |
| PB mill 4 | 1000 | 60000 |
| PB mill 5 | 1000 | 75000 |
| PB mill 6 | 300 | 30000 |
| PB mill 7 | 800 | 56160 |
| PB mill 8 | 400 | 33000 |
|  |  |  |
| N | 8 |  |
| Mill average (unweighted) | 607.50 m3 |  |
| Production-weighted average (Ẋw) | 693.617 m3 |  |
| Sdw | 323.3710282 |  |
| CVw | 0.466209765 |  |
| CVw | 46.62% |  |

| **Toner wastes produced by PB industries** | **Toner waste (kg)** | **PB production (m3)** |
| --- | --- | --- |
|  | xi | wi |
| PB mill 1 | 24 | 45000 |
| PB mill 2 | 50 | 37440 |
| PB mill 3 | 10 | 30000 |
| PB mill 4 | 30 | 60000 |
| PB mill 5 | 100 | 75000 |
| PB mill 6 | 15 | 30000 |
| PB mill 7 | 150 | 56160 |
| PB mill 8 | 30 | 33000 |
|  |  |  |
| N | 8 |  |
| Mill average (unweighted) | 51.125 m3 |  |
| Production-weighted average (Ẋw) | 61.145 m3 |  |
| Sdw | 51.65573774 |  |
| CVw | 0.844798066 |  |
| CVw | 84.47% |  |

| **Diesel consumption in mobile sources by PB industries** | **Diesel used (liters)** | **PB production (m3)** |
| --- | --- | --- |
|  | xi | wi |
| PB mill 1 | 48000 | 45000 |
| PB mill 2 | 20160 | 37440 |
| PB mill 3 | 12000 | 30000 |
| PB mill 4 | 75000 | 60000 |
| PB mill 5 | 90000 | 75000 |
| PB mill 6 | 24000 | 30000 |
| PB mill 7 | 45000 | 56160 |
| PB mill 8 | 15000 | 33000 |
|  |  |  |
| N | 8 |  |
| Mill average (unweighted) | 41145 m3 |  |
| Production-weighted average (Ẋw) | 49828.129 m3 |  |
| Sdw | 30399.3991 |  |
| CVw | 0.610085157 |  |
| CVw | 61% |  |

| **Petrol consumption in mobile sources by PB industries** | **Petrol used (liters)** | **PB production (m3)** |
| --- | --- | --- |
|  | xi | wi |
| PB mill 1 | 6000 | 45000 |
| PB mill 2 | 4500 | 37440 |
| PB mill 3 | 3900 | 30000 |
| PB mill 4 | 3000 | 60000 |
| PB mill 5 | 45000 | 75000 |
| PB mill 6 | 1500 | 30000 |
| PB mill 7 | 6000 | 56160 |
| PB mill 8 | 3000 | 33000 |
|  |  |  |
| N | 8 |  |
| Mill average (unweighted) | 9112.5 m3 |  |
| Production-weighted average (Ẋw) | 12524.386 m3 |  |
| Sdw | 17667.84099 |  |
| CVw | 1.410675193 |  |
| CVw | 141.00% |  |

| **CNG consumption in mobile sources by PB industries** | **CNG used (liters)** | **PB production (m3)** |
| --- | --- | --- |
|  | xi | wi |
| PB mill 1 | 9000 | 45000 |
| PB mill 2 | 3000 | 37440 |
| PB mill 3 | 1500 | 30000 |
| PB mill 4 | 1500 | 60000 |
| PB mill 5 | 24000 | 75000 |
| PB mill 6 | 3000 | 30000 |
| PB mill 7 | 6000 | 56160 |
| PB mill 8 | 3000 | 33000 |
|  |  |  |
| N | 8 |  |
| Mill average (unweighted) | 6375 m3 |  |
| Production-weighted average (Ẋw) | 8124.058 m3 |  |
| Sdw | 8964.377201 |  |
| CVw | 1.103435769 |  |
| CVw | 110% |  |

**Questionnaire Survey Form for LCA of the Particleboard Industry in Pakistan**

The information(s) from this survey will be used in a Ph. D research project at the Department of Environmental Sciences, Quaid-i-Azam University, Islamabad. We will conduct life-cycle assessment that will describe environmental influences of wood product i.e. particleboard. Our objective is to acquire a database and produce life-cycle model of environmental performance for the particleboard production in Pakistan. The database will be the basis for the scientific evaluation of feasible alternatives affecting the environmental releases and energy requirements of particleboard through their life cycle. It is hoped that the output of the study will be used to competitively position wood based product i.e. particleboard in the marketplace over other types of materials.

This Ph. D research project survey is designed specifically for particleboard mills. Questions will be concentrated on annual production, electricity production and usage, fossil fuels use, material flows, and environmental emissions. We realize that you may not have all the information’s requested, especially when it comes to specific equipment and processing groups. However, the data you can provide will be highly appreciated. We intend to maintain the confidentiality of the data and companies participating in this survey. Please contact us if you have any questions.

Company Name: ………………………………………………………………………………………

Facility Site (city, province): ………………………………………………………………………………

Should we have a follow-up question about the data, please provide the name and the following information for the contact in your company.

Name: ………………………………………Title: ………………………………………………….

Telephone:………………………………. E-mail:…………………………………………..

If you have any question (s) about the survey, please contact us at the following addresses.

**Dr. Riffat Naseem Malik**

Chairperson and Supervisor

Department of Environmental Sciences

Quaid-i-Azam University, Islamabad

Email: [r_n_malik2000@yahoo.co.uk](mailto:r_n_malik2000@yahoo.co.uk)

Tele No.: 05190643017

**Majid Hussain**

PhD Scholar

Department of Environmental Sciences

Quaid-i-Azam University, Islamabad

Email: [majid_forester@yahoo.com](mailto:majid_forester@yahoo.com), [mhussai2@utk.edu](mailto:mhussai2@utk.edu)

Cell No. 0300-5202967

**Questionnaire for LCA of the Particleboard Industry in Pakistan**

**Part A: LCA of the Particleboard Industry in Pakistan**

Q.1. Company Name: ………………………………………………………………………

Q. 2. Facility Site (City and Province): ……...……………………………………………..

Q.3. Number of employees: ………………………………………

Q.4. Number of production lines: …………………………………

Q.5. Year of installation of each line: ……………… Line 1…………….. Line 2. …………….

**Annual Production(Please provide units of measurement if different than stated).**

Q. 6: What is the production capacity of your particleboard industry in 2014/15 (m3)…………

Q. 7: What is the typical size and thickness of Particleboard of your industry …………………..

Q. 8: Estimated average density of particleboard panel (kg/m3) ………………………………....

Q. 9: What are the main sources of wood raw material in your industry?

1. Forest slash (kg) …………………….

2. Saw dust (kg) ……………………….

3. Chips (kg) ……………………………

4. Saw waste (kg) ……………………….

5. Others (kg) …………………………...

Q. 10: Which type of resins/adhesives are used in your factory (kg) ……………………………

Q. 11: Production and transport of resin/adhesive’s is from …………………………………….

Q. 12: What is the quantity of wax applied (kg) ………………………………………………….

Q.13: What is the quantity of Ammonium sulfate catalyst used (kg) …………………….……...

Q. 14: What is the quantity of Urea scavenger (kg) ………….………………………………….

Q.15: Other materials sold i.e. sander dust etc.

a. ……………………………………. (lb. or tons), b. ………………………… (lb or tones)

c. ……………………………………. (lb. or tons), d. ………………………… (lb or tones)

Q. 16: Amount of purchased electricity consumed from national grid in Kwh.....……………….

Q. 17: Amount of electricity produced from fossil fuels (Kwh) ………………………………….

Q. 18: Amount of Natural Gas consumption in on-site operations of the unit (m3) ………………

Q.19: Quantity of sander dust used for energy production (kg) ………………………………….

Q. 20: Quantity of in-mill generated wood fuel (kg), if any …………………………………….

Q.21: Quantity of diesel consumed in the PB industry (L) ……………………………………….

Q.22: Quantity of LPG consumed in the PB industry (L) …………………………………………

Q. 23: Quantity of gasoline and kerosene consumed in the PB industry (L) ………………………

Q. 24: Quantity of distillate fuel oil consumed in the PB industry (L) …………………………….

Q. 25: Quantity of Water used for particleboard production (L) …………………………………..

Q. 26: Quantity of wood waste sent to landfill (kg) ………………………………………………

Q. 27: Quantity of wood boiler fuel sold (kg) …………………………………………………….

Q. 28: Quantity of boiler ash sent to landfill (kg) …………………………………………………

Q. 29: One way delivery distance by truck for input materials to particleboard mill.

1. Wood residues delivery distance (km) …………………………………..

2. Resin/adhesive delivery distance (km) ………………………………….

3. Wax delivery distance (km) ……………………………………………..

4. Ammonium sulfate catalyst delivery distance (km) …………………….

5. Urea Scavenger delivery distance (km) …………………………………

**Characteristics of Production Line(s)**: we are required in our protocol to describe the manufacturing process and characterize the technology, thus the questions. If the raw material input to your plant is residue, after 1. Roundwood write “none” under description.

**Line 1: Unit process center Description**

1. Roundwood debarking

& reduction (brand & type)

1. Refiners (Brand and type i.e.,

Pallmann flaker, pressurized

disc refiner, hammer mill, etc.)

1. Screens (Brand and type)
2. Dryers (Brand and type, i.e.,

flash tube, direct fired, sander

dust or natural gas, recycle exhaust).

1. Blenders (Brand and type)

and where resin and wax are

injected to line.

1. Formers (Brand and type).
2. Hot Press (Brand and type--

platen or continuous, no.

openings, platen size, steam or

oil heats, RF assist, etc.)

1. Panel cooler (Brand and type).
2. Trim saws (Brand and type)
3. Sanders (Brand and type)
4. Other

** (Repeat these above steps for the Production Line 2, if there is any).

**Annual Wood Use for PB industry**(Please provide units of measurement if different than stated).

|  | **Wood type (logs dry and green shavings, ply trim, sawdust, etc.).** | **MC of wood as delivered (% oven dry wood basis)** | **Annual Use Weight (tons oven dry, or volume; give units used)** |
| --- | --- | --- | --- |
| 1 | ………………………………….. | ……………………………………… | …………………………………………………….. |
| 2 | ………………………………….. | ……………………………………… | …………………………………………………….. |
| 3 | ………………………………….. | ……………………………………… | …………………………………………………….. |
| 4 | ………………………………….. | ……………………………………… | …………………………………………………….. |
| 5 | …………………………………. | ……………………………………… | …………………………………………………….. |
| 6 | …………………………………. | ……………………………………… | …………………………………………………….. |
| 7 | ………………………………….. | ……………………………………… | …………………………………………………….. |
| 8 | ………………………………….. | ……………………………………… | …………………………………………………….. |
| 9 | …………………………………. | ……………………………………… | …………………………………………………….. |
| 10 | ………………………………… | ……………………………………… | …………………………………………………….. |
|  | **Total wood used** | …………………………………….. | …………………………………………………….. |

**Species Mix**of wood residue used by plant.

|  | **Wood Species (either hardwood or softwood; or actual species if known)** | **% of Total mix** |
| --- | --- | --- |
| 1 | Softwoods |  |
| 2 |  |  |
| 3 |  |  |
| 4 |  |  |
| 5 | Hardwoods |  |
| 6 |  |  |
| 7 |  |  |
| 8 |  |  |
| 9 |  |  |
|  | Total | 100% |

**Annual Energy Consumption:** (Total use for boilers, oil heaters, forklifts, etc. Please provide units of

measurement if different than stated).

| **S.No** | **Energy source** | **Unit** | **Amount or quantity** |
| --- | --- | --- | --- |
| 1 | Purchased electricity | KWh |  |
| 2 | Purchased stream at temp F°? | m3 or lb |  |
| 3 | If you know fuel source used to generate stream, please mention type i.e. hog fuel, natural gas etc. |  |  |
| 4 | Coal | tons |  |
| 5 | Hog fuel (self-generated or purchased please mention? | tons (oven dry) |  |
| 6 | Wood waste | tons (oven dry) |  |
| 7 | Sander dust | tons (oven dry) |  |
| 8 | Residual fuel oil | Liters |  |
| 9 | Distillate fuel oil | Liters |  |
| 10 | Liquid Propane Gas (LPG) | kg or gallons |  |
| 11 | Natural Gas | ft3 or m3 |  |
| 12 | Gasoline and kerosene | Liters or gallons |  |
| 13 | Diesel | Liters or gallons |  |
| 14 | Others, please specify |  |  |
| Less energy sold or transferred | | | |
| 1 | Electricity | KWh |  |
| 2 | Steam at temp F°?? | lbs or m3 |  |
| 3 | Hog fuel | tons (oven dry) |  |
| 4 | Wood waste | tons (oven dry) |  |

**Characteristics of heat sources**

1. Do you have a boiler, fuel cell, or oil heater? Tick appropriate option.

1. Boiler

2. Fuel cell

3. Oil heater

4. Others

1. If you have a boiler, what is its heat source? Tick appropriate option.

1. Hogged fuel

2. Oil

3. Natural gas

4. Others

1. If you have a fuel cell, what is its heat source? Tick appropriate option.
2. Hogged fuel
3. Oil
4. Natural gas
5. Others
6. If you have an oil heater, what is its heat source? Tick appropriate option.
7. Hogged fuel
8. Oil
9. Natural gas
10. Others

**Other Related Information on an annual basis.**

1. **For dryer(s), tick correct option for the heat source type and state the annual fuel consumption if known:**

􀀀. Steam lbs/m3 ………………………………

􀀀. Natural gas direct-fired ft.3/m3 ………………………………

􀀀. Sander dust or other

wood fuel direct fired. Tons (oven dry weight) ……………………………...

􀀀. Other (please specify) ………………… ………………………………

1. **For dryer(s) specify the following:**

􀀀 Type of dryer(s) (i.e. blow tube, etc.) ……………………………….

􀀀 How is dryer(s) heated (direct fired, heat

exchanger, etc.) ……………………………….

􀀀 Do you recycle dryer exhaust, if so to

Where ………………………………..

1. **For dryer(s): check the appropriate box?**

􀀀 Green furnish dried and approximate

percentage of total.

Average moisture content into dryer % oven dry basis ………………………..

Average moisture content out of dryer % oven dry basis ………………………..

Percentage of total wood dried % ………………………..

􀀀 Dry furnish dried and approximate

percentage of total

Average moisture content into dryer % oven dry basis ………………………

Average moisture content out of dryer % oven dry basis ………………………

Percentage of total wood dried % ………………………

1. **Formulation and usage of resin, catalyst, and other components.**

| **Component type** | **% solids by weight** | **Total annual use on a solid or wet basis-please state the basis** |
| --- | --- | --- |
| Urea Formaldehyde |  |  |
| Catalyst |  |  |
| Wax |  |  |
| Water |  |  |
| Other resins (i.e. MUF, PF or PMDI, please state type |  |  |
| Others, please specify |  |  |

1. **Annual water use (check source(s) and give amount):**

􀀀 . Municipal water source Gallons …………………………………….

􀀀. Well water source Gallons …………………………………….

􀀀. Recycled water Gallons …………………………………….

1. **Transportation method and average distance to deliver wood furnish (check method(s)):**

| **Wood furnish (logs, residue, etc.) delivery method** | **Average haul one way (miles/km)** | **% of Total Shipping** |
| --- | --- | --- |
| 􀀀. Truck |  |  |
| 􀀀. Rail |  |  |
| 􀀀. Other(s) |  |  |
|  |  | **Total = 100%** |

1. **Transportation method used to deliver resin**

| **Transportation means for resin delivery** | **Average haul one way (miles/km)** | **% of Total Shipping** |
| --- | --- | --- |
| 􀀀. Truck |  |  |
| 􀀀. Rail |  |  |
| 􀀀. Other(s) |  |  |
|  |  | Total = 100% |

1. **Transportation method used to ship particleboard panels.**

| **Transportation means for resin delivery** | **Average haul one way (miles/km)** | **% of Total Shipping** |
| --- | --- | --- |
| 􀀀. Truck |  |  |
| 􀀀. Rail |  |  |
| 􀀀. Other(s) |  |  |
|  |  | Total = 100% |

**Annual Energy Use by Unit Process** –Please, if you can provide the approximate use of energy in percentage of total mill use, this will be extremely helpful to us.

| **Breakdown of Natural Gas Use** | **Percent (%) or Annual ft3/m3 use** |
| --- | --- |
| Dyers (if direct-fired) |  |
| Boiler |  |
| Oil Heater |  |
| Emissions Control Devices |  |
| Other |  |
| Total |  |
|  | 100% or _________ ft3/m3 |

| **Breakdown of Electricity Use** | **Percent (%) or Annual KWh use** |
| --- | --- |
| Debarking and log reduction |  |
| Refiners |  |
| Dyers |  |
| Blenders |  |
| Formers |  |
| Press(es) |  |
| Cooler |  |
| Trim saws |  |
| Sander(s) |  |
| Boiler(s) |  |
| Oil Heater |  |
| Emissions Control Devices |  |
| Other |  |
| Total |  |
|  | 100% or _________ ft3/m3 |

**Process and Material Flows**

To enable us to model the flow through your operation we would like to know the process order and any by-products generated by the process and where they go. For the order, if the process flow depicted below isn’t correct, i.e., your input is residue and not logs, draw a line through the box, or if the order isn’t correct, i.e., the blender consists of putting the resin directly into the blow line, draw an arrow from the blender to where it is in your process. For the by-product give the lbs/tons per year and where they go, if it goes back into the process, draw a line to where it goes. If there are other by-products, please write them in and provide information. For emissions, draw a line from the process to emission control device. If a process isn’t shown, please add it. Please comment on any parts of your operations that you feel we should be aware of.

Bark—lbs/tons or kg. per year and where does it go?

**Logs/chip**

**Screen**

Fines—lbs. per year

and where do they go?

Overs—lbs. per year and where do they go?

**Refine**

**Dry**

**Oil Heater**

**Boiler**

**Blend**

**Emission Control**

**Form**

Particulate—lbs/kg. per year and where does it

go?

**Bughouse**

**Press**

**Cool**

Panel Trim—lbs/kg. per year

and where does it go?

**Trim**

Sander dust—lbs/kg. per year

and where does it go?

**Sand**

**Annual Material Flow**

This is a general material flow survey for particleboard industry in Pakistan. This survey is designed to trace all wood coming into the plant and out. You have already provided the input material and the output panel production, what we now need to track is by-products through the operation and where they go?

| **Unit Process** | **Material type** | **Amount of material (lbs or tons oven dry?)** | **Where does it go? (Back into a specific unit process, boiler, sold, etc.?)** |
| --- | --- | --- | --- |
| Debark logs | Bark |  |  |
| Screen | Screening fines |  |  |
| Screening overs |  |  |
| Saw & trim | Saw trim |  |  |
| Sanding | Sander dust |  |  |
| Bag house | Bag house dust |  |  |
| Cyclone | Cyclone dust |  |  |
| Other? |  |  |  |

**PB dryers.Please provide units of measurement in terms of annual use.**

| Annual Dryer Throughput:(dry weight basis, lbs or tons) | Dryer No. 1 | Dryer No. 2 | Dryer No. 3 | Dryer No. 4 |
| --- | --- | --- | --- | --- |
| Dryer fuel consumption: |  |  |  |  |
| Wood waste (i.e., sander dust; lbs or tons) |  |  |  |  |
| Natural gas (ft3 or m3) |  |  |  |  |
| Propane (gal.) |  |  |  |  |
| Other? Please state what |  |  |  |  |
| Heating method; check method that applies: |  |  |  |  |
| Direct-fired |  |  |  |  |
| Indirect-fired (heat exchanger) |  |  |  |  |
| Dryer type; check type that applies: |  |  |  |  |
| Blow tube |  |  |  |  |
| Other (please name) |  |  |  |  |

**Emission Control Devices and Environmental Emissions**

The following is a chart of emission control devices and on the following page is a listing of chemical compounds that are observed and/or permitted. Please fill in all information related to the control devices. Then list all compounds that are collected and known for the mill from all control device sources. Fill in all that apply and for which you have data. If you have more than five devices, please make a copy of this page and the next, change numbers from 1 to 6, i.e. ECD 1 to ECD 6, complete form and attach.

| **Emission Control Device (ECD) - Electricity, Fuel Usage and Emission Output** | | | | | |
| --- | --- | --- | --- | --- | --- |
| **ECD1 ECD2 ECD3 ECD4 ECD5** | | | | | |
| Equipment type controlled dryer, press, oil (boiler, heater, etc.?) |  |  |  |  |  |
| Type of device (RTO, RCO, Scrubber, WESP, cyclone, bughouse, etc.?) |  |  |  |  |  |
| Manufacturer and year installed |  |  |  |  |  |
| ECD exhaust temperature (Fo) and flow rate (acfm) |  |  |  |  |  |
| Electricity use in % of total mill use or kWh, please state units |  |  |  |  |  |
| Natural gas use in %of total mill use or ft.3 or m3, please state units |  |  |  |  |  |

| **Annual Emissions to Air (provide data for same device identified on prior page; please provide unit of measurement for each.)** | | | | | |
| --- | --- | --- | --- | --- | --- |
| **Organic Compound** | **ECD1** | **ECD2** | **ECD3** | **ECD4** | **ECD5** |
| **Equipment type controlled (boiler, dryer, press, etc.)** |  |  |  |  |  |
| **Units** | **Tons/year** | **Tons/year** | **Tons/year** | **Tons/year** | **Tons/year** |
| CO2 (you probably don’t have this number but provide if you do) |  |  |  |  |  |
| CO |  |  |  |  |  |
| NOx |  |  |  |  |  |
| SOx |  |  |  |  |  |
| Total VOC |  |  |  |  |  |
| Particulate |  |  |  |  |  |
| PM10 |  |  |  |  |  |
| Lead |  |  |  |  |  |
| Acrolein* |  |  |  |  |  |
| Acetaldehyde* |  |  |  |  |  |
| Propionaldehyde* |  |  |  |  |  |
| Formaldehyde* |  |  |  |  |  |
| Methanol* |  |  |  |  |  |
| Phenol* |  |  |  |  |  |
| Water Vapor |  |  |  |  |  |
| * HAPS; provide total HAPS if you have data, also provide whatever individual HAPS that you record or measure |  |  |  |  |  |
| Other (Please Specify) |  |  |  |  |  |

| **Solid Emissions to Land from All Known Sources (please provide units of measurement)** | | |
| --- | --- | --- |
| **Emission** | **Amount (i.e., tons, lbs.—give units)** | **Method of disposal or end use (i.e., land fill)** |
| Wood waste |  |  |
| Boiler ash and fly ash |  |  |
| Recovered particulates from pollution abatement equipment |  |  |
| Other (please specify) |  |  |

| **Emissions to Water from All Known Sources (please provide units of measurement)** | | |
| --- | --- | --- |
| **Emission** | **Amount (i.e., tons, lbs.—give units)** | **Method of disposal or end use (i.e., sewer)** |
| Suspended solids |  |  |
| Dissolved solids |  |  |
| BOD |  |  |
| COD |  |  |
| Chlorides |  |  |
| Oil and grease |  |  |
| pH of discharged water |  |  |
| Other (please specify) |  |  |
|  |  |  |

**Highlights**

- We conducted the first LCA of particleboard (PB) produced in Pakistan.

Primary data were collected from PB producers on materials acquisition, product manufacture and distribution.

- We calculated ten environmental impact indicators and the cumulative exergy demand for particleboard production.
- Air emissions of most of the mills were found to exceed the NEQS of Pakistan.
- Sensitivity analysis reveal opportunities to improve environmental profile of particleboard manufacture.
